# Supplementary material for: Determinants of podoconiosis among residents of Machakle District East Gojjam Zone Amhara Region Ethiopia
Source: PubMed Central journal article supplement (PMC10581460; doi:10.1371/journal.pntd.0011686), 2023-10-05
Supplement: pntd.0011686.s001.pdf [file pntd.0011686.s001.pdf]

# PLOS Neglected Tropical Diseases

## Determinantes of Podoconiosis among Residents in Machakle District East Gojjam Zone Amhara Region Ethiopia --Manuscript Draft--

|                                                                                         |                                                                                                                                                                                                                                                                                                                                                                                                                                                                                                                                                                                                                                                                                                                                                                                                                                                                                                                                                                                                                                                                                                                                                                                                                                                                                                                                                                                                                                                                                                                                                                                                                                                                                                                                                                                                                                                                                                                                                         |
|-----------------------------------------------------------------------------------------|---------------------------------------------------------------------------------------------------------------------------------------------------------------------------------------------------------------------------------------------------------------------------------------------------------------------------------------------------------------------------------------------------------------------------------------------------------------------------------------------------------------------------------------------------------------------------------------------------------------------------------------------------------------------------------------------------------------------------------------------------------------------------------------------------------------------------------------------------------------------------------------------------------------------------------------------------------------------------------------------------------------------------------------------------------------------------------------------------------------------------------------------------------------------------------------------------------------------------------------------------------------------------------------------------------------------------------------------------------------------------------------------------------------------------------------------------------------------------------------------------------------------------------------------------------------------------------------------------------------------------------------------------------------------------------------------------------------------------------------------------------------------------------------------------------------------------------------------------------------------------------------------------------------------------------------------------------|
| <b>Manuscript Number:</b>                                                               | PNTD-D-23-00471                                                                                                                                                                                                                                                                                                                                                                                                                                                                                                                                                                                                                                                                                                                                                                                                                                                                                                                                                                                                                                                                                                                                                                                                                                                                                                                                                                                                                                                                                                                                                                                                                                                                                                                                                                                                                                                                                                                                         |
| <b>Full Title:</b>                                                                      | Determinantes of Podoconiosis among Residents in Machakle District East Gojjam Zone Amhara Region Ethiopia                                                                                                                                                                                                                                                                                                                                                                                                                                                                                                                                                                                                                                                                                                                                                                                                                                                                                                                                                                                                                                                                                                                                                                                                                                                                                                                                                                                                                                                                                                                                                                                                                                                                                                                                                                                                                                              |
| <b>Short Title:</b>                                                                     | Determinantes of Podoconiosis                                                                                                                                                                                                                                                                                                                                                                                                                                                                                                                                                                                                                                                                                                                                                                                                                                                                                                                                                                                                                                                                                                                                                                                                                                                                                                                                                                                                                                                                                                                                                                                                                                                                                                                                                                                                                                                                                                                           |
| <b>Article Type:</b>                                                                    | Research Article                                                                                                                                                                                                                                                                                                                                                                                                                                                                                                                                                                                                                                                                                                                                                                                                                                                                                                                                                                                                                                                                                                                                                                                                                                                                                                                                                                                                                                                                                                                                                                                                                                                                                                                                                                                                                                                                                                                                        |
| <b>Keywords:</b>                                                                        | Determinants; Machakel; Podoconiosis; Neglected Tropical diseases; Field Epidemiology; Ethiopia                                                                                                                                                                                                                                                                                                                                                                                                                                                                                                                                                                                                                                                                                                                                                                                                                                                                                                                                                                                                                                                                                                                                                                                                                                                                                                                                                                                                                                                                                                                                                                                                                                                                                                                                                                                                                                                         |
| <b>Abstract:</b>                                                                        | <p><b>Background</b></p> <p>Podoconiosis (endemic non-filarial elephantiasis) is a chronic disease characterized by the development of persistent swelling of plantar foot initially; which progresses to the dorsal foot and lower leg slowly or in a number of acute episodes to reach the knee. About 4 million people are said to be affected by the disease worldwide and it is deemed a serious public health problem in at least 10 African countries including Ethiopia. Therefore this study aimed to identify the determinants of Podoconiosis among residence in Machakel district.</p> <p><b>Method</b></p> <p>Unmatched case control study design was conducted at Machakel district from August 30 to September 30, 2022. The sample size was calculated using Epi-info software yielded 211 controls and 106 cases (317 study participants). Simple random sampling technique was used to select the cases using registration books of the district. Data were entered to Epi info version 7 and exported to SPSS version 22 for statistical analysis. Binary logistic regression was used to identify explanatory variables.</p> <p><b>Result</b></p> <p>A total of 312 study participants (104 cases and 208 controls) were included giving for a response rate of 98.42%. Bare foot (AOR, 5.83 [95% CI: 2.34-14.50]), female sex (AOR, 4.25 [95% CI: 2.22-8.14]), family history of podoconiosis (AOR 3.01(95% CI: 1.41-6.42) and age group 41-60 (AOR 5.05(95% CI: 2.35-10.83), and 61-80 AOR 15.74 95% CI: (5.56-44.55) were determinants of Podoconiosis.</p> <p><b>Conclusion and recommendation</b></p> <p>Barefoot, sex, family history of podoconiosis and age group were determinants of Podoconiosis. District health office should encourage for at risk populations especially for older age and family history of podoconiosis about shoe wearing practice in all their lives and do not exposed their skin and feet.</p> |
| <b>Additional Information:</b>                                                          |                                                                                                                                                                                                                                                                                                                                                                                                                                                                                                                                                                                                                                                                                                                                                                                                                                                                                                                                                                                                                                                                                                                                                                                                                                                                                                                                                                                                                                                                                                                                                                                                                                                                                                                                                                                                                                                                                                                                                         |
| <b>Question</b>                                                                         | <b>Response</b>                                                                                                                                                                                                                                                                                                                                                                                                                                                                                                                                                                                                                                                                                                                                                                                                                                                                                                                                                                                                                                                                                                                                                                                                                                                                                                                                                                                                                                                                                                                                                                                                                                                                                                                                                                                                                                                                                                                                         |
| <b>Government Employee</b>                                                              | No - No authors are employees of the U.S. government.                                                                                                                                                                                                                                                                                                                                                                                                                                                                                                                                                                                                                                                                                                                                                                                                                                                                                                                                                                                                                                                                                                                                                                                                                                                                                                                                                                                                                                                                                                                                                                                                                                                                                                                                                                                                                                                                                                   |
| Are you or any of the contributing authors an employee of the United States government? |                                                                                                                                                                                                                                                                                                                                                                                                                                                                                                                                                                                                                                                                                                                                                                                                                                                                                                                                                                                                                                                                                                                                                                                                                                                                                                                                                                                                                                                                                                                                                                                                                                                                                                                                                                                                                                                                                                                                                         |
| Manuscripts authored by one or more US                                                  |                                                                                                                                                                                                                                                                                                                                                                                                                                                                                                                                                                                                                                                                                                                                                                                                                                                                                                                                                                                                                                                                                                                                                                                                                                                                                                                                                                                                                                                                                                                                                                                                                                                                                                                                                                                                                                                                                                                                                         |

|                                                                                                                                                                                                                                                                                                                                                                                                                                                                                                 |                                                                                                                                      |
|-------------------------------------------------------------------------------------------------------------------------------------------------------------------------------------------------------------------------------------------------------------------------------------------------------------------------------------------------------------------------------------------------------------------------------------------------------------------------------------------------|--------------------------------------------------------------------------------------------------------------------------------------|
| <p>Government employees are not copyrighted, but are licensed under a <a href="#">CC0 Public Domain Dedication</a>, which allows unlimited distribution and reuse of the article for any lawful purpose. This is a legal requirement for US Government employees.</p> <p>This will be typeset if the manuscript is accepted for publication.</p>                                                                                                                                                |                                                                                                                                      |
| <p><b>Financial Disclosure</b></p> <p>Enter a financial disclosure statement that describes the sources of funding for the work included in this submission and the role the funder(s) played. This includes grants and any commercial funding of the work or authors.</p> <p>This statement will be typeset if the manuscript is accepted for publication.</p> <p>Review the <a href="#">submission guidelines</a> and the instructions link below for detailed requirements and guidance.</p> | <p>No fund was received</p>                                                                                                          |
| <p><b>Competing Interests</b></p> <p>On behalf of all authors, disclose any competing interests that could be perceived to bias this work.</p> <p>This statement will be typeset if the manuscript is accepted for publication.</p> <p>Review the instructions link below and PLOS NTDs' <a href="#">competing interests</a> policy to determine what information must be disclosed at submission.</p>                                                                                          | <p>The authors declare that they have no competing interests.</p>                                                                    |
| <p><b>Data Availability</b></p> <p>Provide a <b>Data Availability Statement</b> in the box below. This statement should detail where the data used in this</p>                                                                                                                                                                                                                                                                                                                                  | <p>The datasets used and/or analysed during the current study are available from the corresponding author on reasonable request.</p> |

submission can be accessed. This statement will be typeset if the manuscript is accepted for publication.

Before publication, authors are required to make all data underlying their findings fully available, without restriction. Review our [PLOS Data Policy](#) page for detailed information on this policy. Instructions for writing your Data Availability statement can be accessed via the Instructions link below.

1 Determinantes of Podoconiosis among Residents in Machakle District  
2 East Gojjam Zone Amhara Region Ethiopia

3 Teshome Tefera<sup>1</sup>, Kassawmar Angaw Bogale<sup>1</sup>, Yiteka Tegegn<sup>1</sup>, Abebaw Gedef Azene<sup>1</sup>,  
4 Keadnew Mulatu<sup>1</sup>, Gizachew Tadesse Wassie\*<sup>1</sup>

5

6 <sup>1</sup>Department of Epidemiology and Biostatistics, School of Public Health, College of Medicine  
7 and Health Sciences, Bahir Dar University, Bahir Dar, Ethiopia

8

9 \* Corresponding author

10 Po Box: 79

11

12

13

14 **Abstract**

15 **Background:** Podoconiosis (endemic non-filarial elephantiasis) is a chronic disease  
16 characterized by the development of persistent swelling of plantar foot initially; which  
17 progresses to the dorsal foot and lower leg slowly or in a number of acute episodes to reach  
18 the knee. About 4 million people are said to be affected by the disease worldwide and it is  
19 deemed a serious public health problem in at least 10 African countries including Ethiopia.  
20 Therefore this study aimed to identify the determinants of Podoconiosis among residence in  
21 Machakel district.

22 **Method:** Unmatched case control study design was conducted at Machakel district from  
23 August 30 to September 30/ 2022. The sample size was calculated using Epi-info software  
24 yielded 211 controls and 106 cases (317 study participants). Simple random sampling  
25 technique was used to select the cases using registration books of the district. Data were  
26 entered to Epi info version 7 and exported to SPSS version 22 for statistical analysis. Binary  
27 logistic regression was used to identify explanatory variables.

28 **Result:** A total of 312 study participants (104 cases and 208 controls) were included giving  
29 ~~for~~ a response rate of 98.42%. Bare foot (AOR, 5.83 [95% CI: 2.34-14.50]), female sex  
30 (AOR, 4.25 [95% CI: 2.22-8.14]), family history of podoconiosis (AOR 3.01(95% CI: 1.41-  
31 6.42) and age group 41-60 (AOR 5.05(95% CI: 2.35-10.83), and 61-80 AOR 15.74 95% CI:  
32 (5.56-44.55) were determinants of Podoconiosis.

33 **Conclusion and recommendation:** Barefoot, sex, family history of podoconiosis and age  
34 group were determinants of Podoconiosis. District health office should encourage ~~for~~ at risk  
35 populations especially ~~for~~ older age and family history of podoconiosis about shoe wearing  
36 practice in all their lives and ~~do~~ not exposed their skin and feet.

37 **Key words:** Determinants, Machakel, Podoconiosis, Neglected Tropical diseases, Field  
38 Epidemiology, Ethiopia.

39

#### 40 **Introduction**

41 Podoconiosis is a chronic disease characterized by the development of persistent swelling of  
42 plantar foot initially; which progresses to the dorsal foot and lower leg slowly or in a number  
43 of acute episodes to reach the knee. Finally, the disease may end up in a permanent feature of  
44 elephantiasis of varying degree. The disease is common in families of barefooted  
45 agriculturalists of tropical Africa(1).

46 Podoconiosis (from the Greek word for foot: podos, and dust: konos) is unique in being an  
47 entirely preventable non-communicable tropical disease. In local communities, it is often  
48 called ‘mossy foot disease’, because the skin becomes rough and bumpy and its appearance  
49 resembles moss(2).

50 Podoconiosis has a curable pre-elephantiasis phase. However, once elephantiasis is  
51 established, podoconiosis persists and may cause lifelong disability(3). Podoconiosis  
52 (endemic non-filarial elephantiasis) has been recognized as a specific disease entity for over  
53 one thousand years and is widespread in tropical Africa, Central America and north India, yet  
54 it remains a neglected and under-researched condition(4). It is non-infective, usually  
55 crystalline blockage of the limb lymphatic, almost always affecting the lower limbs,  
56 especially the feet. It is widely distributed in a number of countries of tropical Africa,  
57 Central and South America, North India, Indonesia, Colombia, Ecuador, Brazil and Sri Lanka  
58 (5).

59 Podoconiosis (endemic non-filarial elephantiasis) is a geochemical disease occurring in  
60 individuals exposed to red clay soil of volcanic origin(6). The disease causes bilateral, but  
61 asymmetrical swelling almost invariably of the lower legs(7). Early symptoms of  
62 podoconiosis include itching of the skin of the forefoot and recurrent episodes of burning and  
63 oedema of the foot or lower leg, especially after periods of intense physical activity(8).

64 Although the aetiology is not fully understood, existing scientific evidence suggests the  
65 important role of exposure to irritant red clay soil in endemic areas as well as the effect of  
66 genetic susceptibility(9). Podoconiosis is found in highland areas of tropical Africa, Central

67 America and north-west India. Areas of high prevalence have been documented in Uganda  
68 (10), Tanzania (11), Kenya (12), Rwanda, Burundi, Sudan and Ethiopia (13), and in  
69 Equatorial Guinea (14), Cameroon (15), the islands of Bioko, Sao Tome & Principe (16) and  
70 the Cape Verde islands. And it is related to poverty. Studies have also indicated that  
71 podoconiosis exists in areas where the altitude is above 1000meters above sea level and  
72 annual rainfall above 1000 millimetres. About 4 million people are said to be affected by the  
73 disease worldwide and it is deemed a serious public health problem in at least 10 African  
74 countries(1,17).

75 Podoconiosis is a multifactorial disease with evidence of genetic susceptibility and  
76 environmental exposure(18). Although the ethology is not fully understood, current evidence  
77 suggests genetic susceptibility and the role of mineral particles from irritant volcanic soils  
78 supposed to cause podoconiosis(19).The disease only affects some barefoot individuals; not  
79 all exposed individuals develop podoconiosis.

80 Podoconiosis follows a chronic course causing progressively increasing disability with  
81 continued exposure to irritant soils. It results in bilateral progressive chronic swelling of the  
82 lower legs, usually limited below the level of the knees. The pathogenesis of the disease has  
83 not yet been investigated in depth, but it is believed to be caused by fine particles in the soil  
84 that penetrate the skin and induce an inflammatory reaction in the lymphatic system(20).  
85 However, early stage disease can easily be treated by foot hygiene, bandaging and shoes.

86 Podoconiosis is classified into five stages where the first stage swelling is limited to below  
87 the ankle and is reversible overnight. The second stage swelling is not reversible, and when  
88 bumps and knobs are present they remain below the level of the ankle. In the third stage of  
89 the disease, bumps and knobs are found above the level of the ankle. The fourth stage entails  
90 above knee swelling whereas the fifth stage involves joint fixation as a result of surrounding  
91 soft tissue overgrowth(20).

92 Podoconiosis has recently been included in the World Health Organization's Neglected  
93 Tropical Diseases (NTDs) list(21). Areas of high prevalence of podoconiosis have been  
94 documented in tropical Africa, Central America and north India(22). Of affected countries,  
95 Ethiopia appears to have the highest number of people with podoconiosis(23), with 11  
96 million people at risk through exposure to irritant soil, and an estimated 1 million people  
97 affected countrywide(24). In Ethiopia, prevalence estimates range from 2.8 to 7.4% in  
98 endemic areas(24-26). Podoconiosis can be prevented, early forms of the disease can be

99 treated, and disease progression can be controlled with simple but effective measures such as  
100 washing feet with soap and water on a regular basis and wearing protective shoes  
101 consistently(1). Hence this study aimed to study the determinants of podoconiosis in  
102 Machakel district Ethiopia.

## 103 **Methods and Materials**

### 104 **Study Area**

105 This study was conducted in Machakel district. Machakel district is one of the districts in  
106 East Gojjam zone, Amhara national Regional State. It is found at a distance of 328 km North  
107 West from Addis Abeba, the capital city of Ethiopia, 237 km far from Bahir Dar, the capital  
108 city of Amhara Region. Machakel woreda is bordered by on the North by Bibugn district, on  
109 the South by Debre Elias district, on the Northwest by Sinan, on the Southwest by Gozamen  
110 and on the East by Dembecha (West Gojjam).According to the 2014 E.C projected census  
111 2007, the total population is 146,942 from which about 73,618(50.1%) are female and  
112 73,324(49.9%) male population. Machakel district has 30 kebeles. In the Machakel district,  
113 there are 24 health posts and six health centres all are providing health service.

### 114 **Study design and period**

115 Unmatched case control study design was conducted from August 30 to September 30 / 2022.

### 116 **Source and Study population**

117 All resident of Machakel district were the source population. Whereas the study population  
118 was all adult patients age 18 and older ~~those who~~ identified and registered as podoconiosis  
119 case by the district and ~~those~~ neighbouring individuals without podoconiosis.

120 Cases: Were person of age 18 and old, resided in all kebeles of Machakel district and who  
121 had diagnosed and registered as podoconiosis case by the district.



122 Controls: Were person ~~with~~ age 18 years and old who ~~had~~ not podoconiosis after ~~diagnosed~~  
123 by clinical nurses ~~clinically~~ and who lives in the neighbouring house to podoconiosis patients  
124 (case).

### 125 **Inclusion criteria**

126 Cases: were residents of Machakel district and those registered as podoconiosis cases of age  
127 18 years and old resident in the study area for at least for the last six months were included.

128 Controls: were those age of 18 years and old, resident of Machakel district, who had not  
129 developed podoconiosis diseases and neighbour to a podoconiosis patient (case).

### 130 **Exclusion criteria**

131 Cases: Severely ill and bed riddle cases, age less than 18years and resided less than six  
132 months was excluded during the data collection period.

133 Controls: Those people without podoconiosis and not being neighbour to the cases were  
134 excluded.

### 135 **Sample size determination**

136 The sample size was calculated using Epi-info 7 software based on the assumption of 95%  
137 confidence interval, 85% power, control to case ratio of 2:1, ~~present~~ of exposed family  
138 history among controls 11.4%, odds ratio to be detected as 2.81(15) and non-response rate of  
139 10% yielding 211 controls and 106 cases (317 study participants).

### 140 **Sampling Techniques**

141 Simple random sampling technique was used to select the cases from podoconiosis  
142 registration books of Machakel woreda health office as a sampling frame. The control groups  
143 were included from the community and Simple random sampling technique was used to

144 select the control. Those controls were selected from neighbouring of the cases by lottery  
145 method.

## 146 **Variables**

147 Dependent variable

148 ✓ Podoconiosis case(yes/no)

149 Independent variables

150 ✓ **Socio-demographic Characteristics** such as: Age, Sex, Residence, Income,

151 Educational status, Occupation,

152 ✓ **Behavioural related factors** : Feet washing practice, and Shoe Wearing practice

153 ✓ **Family history**: 1<sup>st</sup> degree, 2<sup>nd</sup> degree, 3<sup>rd</sup> degree and others family

## 154 **Operational Definition**

155 **Cases**: Those podoconiosis cases registered by the district as a podoconiosis case and found  
156 on the sampling frame.

157 **Controls**: A person who had not podoconiosis disease after diagnosed by the clinical nurses  
158 clinically and neighbours of cases.

159 **Feet washing**: patient daily wash their foot with soap.

160 **Barefoot**: not wearing any type of shoe every day.

161 **Family history**: History of podoconiosis in the family clustering, such as, 1<sup>st</sup> degree( parents,  
162 child), 2<sup>nd</sup> degree( grandparents, siblings), 3<sup>rd</sup> degree( aunt, uncle, nephew, cousin, niece),  
163 other (husband and wife)(11).

164 **Shoe wearing**: wearing a full covering shoe every day during each activity.

## 165 **Data collection tools and techniques**

166 Data were collected using interviewer administered questionnaire ~~it was~~ prepared in English  
167 and translated into Amharic language for the purpose of community level and back to English  
168 for checking language consistency. Data was collected by clinical nurse. The whole data  
169 collection process was supervised by health officers.

### 170 **Data quality control**

171 Questionnaire were prepared in English version by reviewing different literatures and  
172 translated in to Amharic (local language) and back to English by different language experts  
173 for consistency. Steps were taken to ensure the quality of this work. Pre-test was conducted  
174 on 16(5%) study participants in another district and necessary corrections were made on the  
175 questionnaire. The supervisors and principal investigator closely following the day to day  
176 data collection process to ensure completeness and consistency of the collected  
177 questionnaires on a daily basis. Training was given for the data collectors and supervisors,  
178 ~~and the whole data collection process was closely supervised.~~

### 179 **Data processing and analysis**

180 Prior to analysis, the whole data was cleaned and checked for completeness. Errors related to  
181 inconsistency ~~was~~ verified using cross tabulation and other data exploration methods .After  
182 **the completeness of the data checked;** it was entered into Epi-Info version 7.2.1.0 software  
183 packages and transferred to SPSS version 22 software for analysis. Descriptive statistics was  
184 used to give a clear picture of background variables like age, sex, and other variables. The  
185 frequency distribution of both dependent and independent variables were done. Binary  
186 logistic regression was used to identify the determinants of ~~Podocniosis~~ and the single  
187 independent variable with the outcome variable. Hosmer-Lemeshow test was used to check  
188 goodness of fit of the model. Variables having an association with the outcome variable a p-  
189 value of less than 0.2 were considered in the multivariable logistic regression analysis.

190 Adjusted odds ratios (AORs) with 95% confidence intervals were used to show association  
 191 between explanatory variables and a dependent variable. Those independent variables with  
 192 P-value < 0.05 was considered statistically significant factors associated with outcome  
 193 variable.

194 **Results**

195 **Socio-demographic characteristics of participants**

196 A total of 312 participants (104 cases and 208 controls) were included, giving for a response  
 197 rate of 98.42%. The mean age of respondents was 47.21 years (SD 11.47 years). Nearly two  
 198 third 229(73.32%) were farmers by occupation. The mean age of the cases was 53.8 years  
 199 (SD=15.43 years). Female constitute 67.30 % of cases, 58(55.76 %) of cases had family  
 200 history of **Podoconiosis**, the proportion of bare foot among cases was 30.76% and 76.92% of  
 201 cases ~~were~~ ~~can not~~ read and write.

202 The mean age of controls was 43.88 years (SD 9.5 years). Having family history of  
 203 **Podoconiosis** was recorded in (57.69%), bare foot (11.53%), ~~Female~~ (44.71%) and ~~of~~ farmer  
 204 ~~occupation~~ constitutes (71.15 %) of controls (Table 1).

205 Table 1: Socio-demographic characteristics of study participants in Machakel district North-  
 206 West Ethiopia, 2022.

| <b>Characteristics</b> | <b>Category</b> | <b>Cases (n (%))</b> | <b>Controls (n (%))</b> |
|------------------------|-----------------|----------------------|-------------------------|
| <b>Sex</b>             | Male            | 34(54.8)             | 115(60)                 |
|                        | Female          | 70(45.19)            | 93(44.71)               |
| <b>Age</b>             | 21-40           | 14(13.46)            | 93(44.71)               |
|                        | 41-60           | 63(60.57)            | 101(48.55)              |
|                        | 61-80           | 27(25.96)            | 14(6.73)                |
| <b>Residence</b>       | Urban           | 16(15.38)            | 29(13.9)                |
|                        | Rural           | 88(84.6)             | 179(86.05)              |
| <b>Marital status</b>  | Unmarried+      | 32(30.7)             | 13(6.25)                |

|                   |                     |           |            |
|-------------------|---------------------|-----------|------------|
|                   | Married             | 72(69.23) | 195(93.75) |
| <b>Occupation</b> | Merchant            | 4(3.8)    | 11(5.25)   |
|                   | Farmer              | 81(77.88) | 148(71.15) |
|                   | House wife          | 16(15.38) | 47(22.59)  |
|                   |                     |           |            |
| <b>Education</b>  | Not read and wright | 80(76.92) | 112(53.84) |
|                   | Read and wright     | 21(20.19) | 67(32.21)  |
|                   | primary             | 2(1.92)   | 28(13.65)  |
|                   | Higher              | 1(0.96)   | 0(0)       |
| <b>Income</b>     | 500-1500            | 48(46.15) | 48(23.41)  |
|                   | 1501-3500           | 43(41.34) | 118(57.56) |
|                   | >3500               | 13(12.5)  | 42(20.2)   |

207

## 208 Behavioural related factors of participants

209 The proportion of bare foot among cases was 32(30.76%) whereas it was 24(11.53%) among  
 210 controls. About 84(80.76%) of cases and 188(90.38%) of controls did wash their feet 6-8  
 211 times per week and 52(50%) of cases, 152(73.07%) of controls wash their feet 6-8 times per  
 212 week with soap.

213 Among cases, 26(25%) and 9(8.6%) did wear shoe at work and at home respectively. Whereas  
 214 88(42.30%) and 38(18.26%) were among controls, respectively. Regarding mechanism of  
 215 feet washing, among cases 84(80.76%) washed their legs with water only. About  
 216 188(90.38%) controls washed their legs with water only. Among cases 12(11.5%) and  
 217 controls 120(57.69%) start shoe wearing between 1-20 years of age. About 58(55.76%) of  
 218 cases and 120(57.69%) controls had family history of podoconiosis (Table 2).

219 Table 2: Behavioural related factors of podoconiosis in Machakel district North-West  
 220 Ethiopia, 2022

| Characteristics                 | Category     | Cases (n (%)) | Controls (n (%)) |
|---------------------------------|--------------|---------------|------------------|
| Having enough water for washing | Yes          | 104(100)      | 208(100)         |
|                                 | Washing feet | 1-2 times     | 2(1.92)          |
|                                 |              |               | 0(0)             |

|                       |                 |           |            |
|-----------------------|-----------------|-----------|------------|
| <b>per week</b>       | 3-5 times       | 17(16.34) | 13(6.25)   |
|                       | 6-8 times       | 84(80.76) | 188(90.38) |
|                       | >8              | 1(0.96)   | 7(3.36)    |
| <b>Washing feet</b>   | 1-2 times       | 5(4.80)   | 10(4.80)   |
| <b>per week with</b>  | 3-5 times       | 33(31.73) | 35(16.82)  |
| <b>soap</b>           | 6-8 times       | 52(50)    | 152(73.07) |
|                       | >8              | 0(0)      | 2(0.96)    |
| <b>Barefooted</b>     | Yes             | 32(30.76) | 24(11.53)  |
|                       | No              | 72(69.23) | 184(88.46) |
| <b>Starting year</b>  | 1-20 year       | 12(11.53) | 120(57.69) |
| <b>of shoe</b>        | 21-40 year      | 53(50.96) | 59(28.36)  |
| <b>wearing</b>        | 41-60           | 7(6.73)   | 5(2.40)    |
| <b>Years with</b>     | All years       | 30(28.84) | 181(87.01) |
| <b>shoe wearing</b>   | More than have  | 22(21.15) | 2(0.96)    |
|                       | the year        |           |            |
|                       | Half year       | 16(15.38) | 1(0.48)    |
|                       | Less than year  | 4(3.84)   | 0()        |
| <b>Days with shoe</b> | Every day       | 47(45.19) | 194(93.26) |
| <b>from the week</b>  | More than 5 day | 22(21.15) | 4(1.95)    |
|                       | 2-5 day         | 35(33.65) | 10(4.80)   |

221

## 222 **Factors Associated with Podoconiosis**

223 ~~Bare foot~~, sex, family history of podoconiosis, occupation, marital status, ~~Age~~ and ~~owned a~~  
 224 pair of shoes were found to be associated with Podoconiosis in the uni-variable binary  
 225 logistic regression analysis at p values < 0.2.

226 From multivariable logistic regression analysis, ~~Sex~~, bare foot, family history of podoconiosis  
 227 and age were found to be associated with Podoconiosis with 95% CI, at p-value < 0.05  
 228 statistical significance level. The goodness-of-fit statistics for the model ~~were~~ assessed by  
 229 using the Hosmer-Lemeshow test, with a p-value of 0.97.

230 The odds of having Podoconiosis was 5.83 times higher in bare footed persons (AOR 5.83,  
 231 95% CI: 2.34-14.5) as compared who wore shoes. The odds of having Podoconiosis 4.25  
 232 times higher in females (AOR 4.25: 95% CI: 2.22-8.14) as compared to males. The odds of  
 233 having Podoconiosis was 3.01 times higher among participants who had family history of  
 234 podoconiosis [AOR= 3.01, 95% CI: 1.41-6.42] as compared to that of those who had no  
 235 family history of podoconiosis. The odds of having podoconiosis was 2.05 times higher in  
 236 age group 41-60(AOR=5.05, 95% CI: 2.35-10.83) and 15.74 times higher in age group 61-80  
 237 (AOR=15.74, 95% CI: 5.56-44.55) as compared to age less than 40 (Table 3).

238 Table 3: Factors associated with podoconiosis in Machakel district North-West Ethiopia,  
 239 2022.

| Variables            | Category   | case | Cont<br>rol | COR [95% CI]      | AOR [95% CI]       |
|----------------------|------------|------|-------------|-------------------|--------------------|
| Bare foot            | No         | 72   | 184         | 1                 | 1                  |
|                      | Yes        | 32   | 24          | 3.40(1.87-6.17)   | 5.83(2.34-14.50)*  |
| Sex                  | Female     | 70   | 93          | 2.54(1.55-4.16)   | 4.25(2.22-8.14)*   |
|                      | Male       | 34   | 115         | 1                 | 1                  |
| Marital status       | Single     | 3    | 6           | 1                 | 1                  |
|                      | Married    | 80   | 195         | 0.82(0.2-3.36)    | 0.19(0.03-1.11)    |
|                      | Divorced   | 11   | 3           | 7.33(1.11-48.26)  | 0.83(0.09-7.5)     |
|                      | Widowed    | 10   | 4           | 5.00(0.82-30.46)  | 0.34(0.04-2.94)    |
| Age group            | 21-40      | 14   | 93          | 1                 | 1                  |
|                      | 41-60      | 63   | 101         | 4.14(2.17-7.89)   | 5.05(2.35-10.83)*  |
|                      | 61-80      | 27   | 14          | 12.81(5.44-30.14) | 15.74(5.56-44.55)* |
| Family history       | No         | 46   | 88          | 1                 | 1                  |
|                      | Yes        | 58   | 120         | 1.09(1.21-3.11)   | 3.01(1.41-6.42)*   |
| Occupation           | Farmer     | 81   | 148         | 0.36(0.06-2.22)   | 0.62(0.07-5.35)    |
|                      | House wife | 16   | 47          | 0.22(0.03-1.48)   | 0.27(0.02-2.74)    |
|                      | Merchant   | 7    | 13          | 1                 | 1                  |
| Owned a pair of shoe | No         | 4    | 3           | 2.73(0.6-12.44)   | 2.5(0.38-16.53)    |
|                      | Yes        | 100  | 205         | 1                 | 1                  |

240 1=Reference, \*=significant at p-value <0.05 in multivariable logistic regression

241

## 242 **Discussion**

243 Even though podoconiosis has been known for more than a millennium, it has been neglected  
244 and under-researched. Podoconiosis has recently been designated neglected tropical disease  
245 status by the WHO(25) .

246 Bare footed people were at higher risk to develop podoconiosis as compared to that of their  
247 counterparts. This implies that bare footed individuals might be exposed to irritant minerals  
248 found in earth. This leads to Podoconiosis. This finding was agreed with the study conducted  
249 in Southern Ethiopia(26). This might be due to the reason that barefooted individuals may  
250 allow mineral particles from the soil to enter in to their feet that can possibly initiate the  
251 pathology of the disease(27, 28).

252 Being female was another variable with higher odds among cases compared to Males. This  
253 finding agreed with a study done in West and East Gojjam zone shows that; The odds of  
254 Podoconiosis was lower risk in males (15). This is might be due to variation in exposure in  
255 males and females in these areas. Traditionally males usually wear shoes frequently than  
256 females.

257 Family history of podoconiosis was also at higher odds among cases than controls. This  
258 might be due to the effect of genes in the development of Podoconiosis(29). This study was  
259 in line with a study done in West and East Gojjam zone (35).

260 Older age, particularly people aged 41-60 years and 61-80 years were at higher risks to  
261 develop podoconiosis as compared to those with age group less than 40 years. This implies  
262 that older age individuals might have long-term exposure to irritant minerals on the earth that  
263 may increase the risk of developing podoconiosis.

264

265

266



267 **Limitation of the study**

268 The limitation of this study was the possibility of recall bias that might have been introduced  
269 due to retrospective nature of the study design.

270 **Conclusion**

271 Podoconiosis is a common but neglected tropical disease leading to  
272 dramatic non filarial elephantiasis in the tropics region. This study showed that the  
273 determinant factors of Podoconiosis are regular walking on barefoot, family history of  
274 podoconiosis, female sex and older age. People should be encouraged to wearing shoes all  
275 the time. Particularly, females in the study area and other similar settings should be given  
276 attention in the ~~existed~~ primary health care packages to promote shoes wearing as males.

277 **Declarations**

278 Ethics approval and consent to participate

279 The ethical clearance issues of this study were reviewed and approved by the Ethical Review  
280 Committee (IRB) of the College of Medicine and Health Sciences, Bahir Dar University.  
281 Permission letter was also obtained from Amhara Public Health Institute (APHI) before the  
282 actual data collection; permission was taken from East Gojjam zone health department and  
283 Machakel woreda health office. Written informed consent was taken for each participant.  
284 Confidentiality was kept and their name was changed to codes.

285 **Consent for publication**

286 Not applicable

287 **Availability of data and material**

288 The datasets used and/or analysed during the current study are available from the  
289 corresponding author on reasonable request.

290 **Competing interests**

291 The authors declare that they have no competing interests.

292 **Funding**

293 No fund was received

294 Authors' contributions

295 TT conceived and designed the research protocol. KA, YT, AG, KM and GT approved the  
296 proposal with extensive revisions, participated in the data analysis, and had written the  
297 manuscript. All authors have read and approved the final manuscript.

298 Acknowledgment

299 We would like to thank Machakel District Health Office workers for giving me baseline and  
300 supportive letter for data collection. Also, we would thank the data collectors and the study  
301 participants.

## 302 **References**

303

- 304 1. Tekola F MD, Davey G. Economic costs of endemic non-filarial elephantiasis in Wolaita Zone,  
305 Ethiopia. *Trop Med Int Health*. 2006.
- 306 2. Yakob B, K. Deribe, and G. Davey,. Health professionals' attitudes and misconceptions  
307 regarding podoconiosis: potential impact on integration of care in southern Ethiopia. *Transactions of*  
308 *the Royal Society of Tropical Medicine and Hygiene*,. 2010.
- 309 3. Tekola F, et al., . Development and testing of a de novo clinical staging system for  
310 podoconiosis (endemic non-filarial elephantiasis),. *Tropical Medicine & International Health*,. 2008.
- 311 4. Geshere G TF, Petros B. Parasitological,. serological and clinical evidence for high prevalence  
312 of podoconiosis (non-filarial elephantiasis) in Midakegn district, central Ethiopia. *Tropical Medicine*  
313 *and International Health*,. 2012; .
- 314 5. Nenoff P CJ, Muylowa K, Davey G. . Podoconiosis-non-filarial geochemical elephantiasis-a  
315 neglected tropical disease. *journal of German society of dermatology* ,. 2010; .
- 316 6. Desta A CM, Hendric D, Emi Watanabe,Tsega G et al., .

317

318 A qualitative study exploring barrier related to use of foot wear in rural highland Ethiopia,. 2013.

- 319 7. Wanji S TN, Esum M, Che JN, Mand S, et al. , .

320

321 endemic elephantiasis of the lower legs in tropical Africa,. 2008.

- 322 8. Elephantiasis (Elephantitis) Diseases, Types, Pictures, Treatment,.
- 323 9. Kebede D ST, Fasil TokolaAyele, Richard O.Phillips ,, .

324

325 ten years of Podoconiosisreaserch in Ethiopia,. 2013.

- 326 10. E.W. P. The association of endemic elephantiasis of the lower legs in east Africa with soil  
327 derived from volcanic rocks,. 1976; .

- 328 11. WHO. Diseases covered by NTD Department, Book Diseases covered by NTD Department,.  
329 2011.

- 330 12. Price E. Podoconiosis. Non-filarial Elephantiasis,. Oxford Medical Publications. 1990.
- 331 13. Cohen LB. idiopathic lymphoedema of Ethiopia and Kenya,. East Africa  
332 Medical Journal. 1960.
- 333 14. Academic Medical Centre / University of Amsterdam A, the Netherlands, \*corresponding  
334 author. Podoconiosis, a neglected tropical disease. 2012.
- 335 15. Elfu B. Determinants of Podoconiosis, . 2017
- 336 16. Yordanos B ST, Tsige A, Abreham T, Gail D. Patients' perceptions of podoconiosis causes,  
337 prevention and consequences in East and West Gojam, Northern Ethiopia. . 2011; .
- 338 17. EW. P. Endemic elephantiasis of the lower legs in Rwanda and Burundi,. 1976.
- 339 18. Ruiz L, E Campo, M Corachan: . Elephantiasis in Sao Tome and Principe,. 1994.
- 340 19. ARGACHEW Y. ASSOCIATION BETWEEN FOOT TYPE AND PODOCONIOSIS,. 2018.
- 341 20. Mousley E, et al., . The impact of podoconiosis on quality of life in Northern Ethiopia. Health  
342 and quality of life outcomes,. 2013.
- 343 21. Sime H DK, Assefa A, Newport MJ, Enquesselassie F, Gebretsadik A, et al. Integrated mapping  
344 of lymphatic filariasis and podoconiosis: lessons learnt from Ethiopia,. 2014.
- 345 22. Frommel D AB, Pfeifer HR, Sanchez A, Frommel A, Mengistu G. . Podoconiosis in the  
346 Ethiopian Rift Valley,. 1993.
- 347 23. Feven Dejene1 HM, Henok Asefa2. podoconiosis and associated factors in Dano district, .  
348 2019.
- 349 24. Feven Dejene1 HM, Henok Asefa2. associated factors of podoconiosis,. 2019.
- 350 25. Organisation WH. Podoconiosis, a neglected tropical disease. 2011.
- 351 26. Meskele AEHYM KE. Podoconiosis Prevalence and Its Associated Factors in Soddo Zuria  
352 District,.
- 353 27. Ministry of Health(MoH). Lymphatic filariasis and podoconiosis morbidity management and  
354 disability prevention guidelines,. 2016.
- 355 28. Muli J GJ, Kagai J. Soil iron and aluminium concentrations and feet hygiene as possible  
356 predictors of Podoconiosis occurrence in Kenya,. 2017.
- 357 29. (Nenoff P CJ, Muylowa K, Davey G. Podoconiosis-non-filarial geochemical elephantiasis-a  
358 neglected tropical disease,. 2010.

359

360

361

362

363

364

365

366

367

368

369
